# Supplementary material
Source: publisher site journal article supplement (https://www.dovepress.com/article/545278)
Supplement: Supplementary file 1 [file 545278%20Revised%20Supplementary%20Material.docx]

Table S1: Initial Draft of Sense of Coherence Intervention Program for Newly Diagnosed HIV MSM

| Stage | Time | Theme | Goals | Content |
| --- | --- | --- | --- | --- |
| Stage One  Acquaintance | First Week (Stage 1.0) | Establishing Trust | 1. Establish trust  2. Participants understand the intervention process | 1. Intervener Self-Introduction  Enhance the participants' trust and dependence on the intervener.  2. Introduction of Intervention Purpose  Provide the participants with a clearer understanding of the intervention's significance and expected outcomes, increasing their enthusiasm to participate.  3. Introduction of Intervention Format  Clarify the intervention process and scheduling to set participants' expectations and improve adherence.  4. Precautions  Use friendly and clear language, avoiding specialized jargon to ensure the participants can understand and accept the information. |
| Stage Two  Comprehensibility | Second Week (Stage 2.1) | Analyzing Stress | Understanding Stress | 1. What is Stress?  2. Unique Stresses Faced by Newly Diagnosed HIV MSM  2.1 Minority Stress  2.2 HIV-Related Stress  3. Stress and Health  4. Homework Assignment  Fill in “My Stress Map” Centered around a smiley face, draw circles of varying sizes and distances from the center to represent levels of stress and urgency. Inside each circle, note stress events, which could be related to health, work, or family. |

Table S1 Continued

| Stage | Time | Theme | Goals | Content |
| --- | --- | --- | --- | --- |
| Stage Two  Comprehensibility | Third Week (Stage 2.2) | Coping with Stress | 1. Change negative perceptions of stress.  2. Master a stress relaxation technique. | 1. Review of Last Week's Content  2. Change the Perceptions of Stress  3. Master a Relaxation Technique  Breathing Relaxation Training  Choose a quiet, comfortable place and adopt a comfortable posture. Close your eyes and focus on your breathing. Relax your body and mind through deep inhalation and slow exhalation, concentrating throughout the process on the air entering and leaving your lungs, feeling the rise and fall of your chest and abdomen. If your thoughts begin to wander, gently bring your attention back to your breathing without getting caught up in them.  4. Homework Assignment  Practice and master the breathing relaxation training. |
| Stage Three Manageability | Fourth Week (Stage 3.1) | Stimulating Internal Resources: Uncovering Personal Potential | Uncover hidden internal resources and stimulate personal potential | 1. Review of Last Week's Content  2. Understanding Internal Resources  3. Activating Internal Resources  Guide participants through a life review, using milestones such as “my most successful moment” or “my proudest moment” as starting points. Recall past successes to re-experience the feelings of success and pride. Through these recollections, help participants discover their strengths and potential.  4. Developing Internal Resources  5. Homework Assignment  Reflect on past challenges and successes. Select a proud achievement, describe the internal resources used, and explain how they contributed to your success. |

Table S1 Continued

| Stage | Time | Theme | Goals | Content |
| --- | --- | --- | --- | --- |
| Stage Three Manageability | Fifth Week (Stage 3.2) | Identifying External Resources:Discovering External Support | Identify external resources to help solve dilemmas | 1. Review of Last Week’s Content  2. Understanding External Resources  3 What External Resources Do I Have?  3.1 Government Agencies  (1) Source of resources;  (2) How to access  3.2 Medical Resources  (1) Source of resources;  (2) How to access  3.3 Social Networks and Media Resources  (1) Source of Resources;  (2) How to Access.  3.4 Social Organizations  (1) Source of resources  (2) How to access  5. Homework Assignment  Choose an external resource and describe how you can use this resource to support yourself in facing HIV infection. |

Table S1 Continued

| Stage | Time | Theme | Goals | Content |
| --- | --- | --- | --- | --- |
| Stage Four  Meaningfulness | Sixth Week (Stage 4.1) | Reflecting Meaningfulness Growth Amid Challenges | Through the movie Ikiru reflect on life's challenges to discover inherent meanings and values | 1. Review of Last Week's Content  2. Understanding Internal Resources  How would you choose and pursue the meaning of life when facing adversity?  3. Watching Ikiru  Watch Ikiru together to delve deeply into the protagonist’s story, exploring the meaning and value of life, and seeking answers amidst confusion.  4. Homework Assignment  Reflect on how you would choose and pursue the meaning of life when facing difficulties. |
| Week Seven (Stage 4.2) | Exploring Meaningfulness: Finding Meaning in Life | Finding Meaning in Life Under Stressful Situations | 1. Review of Last Week's Content  2. Stimulating Participants' Thought and Emotional Experience  Guide participants to reflect on how to find hope and courage in difficult situations through the protagonist's journey of facing challenges and transformation in the movie; help participants understand the stress in life and discover the inherent meaning and value.  3. How to Make My Life More Meaningful  3.1 Psychologist's Advice  3.2 The Importance of Helping Others  4. Homework Assignment  Integrate helping others into your own life, record three good things that happen this week, and write down the reasons and your feelings about them. |

Table S1 Continued

| Stage | Time | Theme | Goals | Content |
| --- | --- | --- | --- | --- |
| Fifth Stage: Summary | Week Eight (Stage 5) | Summary | Program Review | 1. Conduct a systematic review of the intervention content, organize it, and consolidate the learned material.  2. Encourage participants to apply the learned content in their daily lives, emphasizing the importance of applying knowledge to practice.  3. Express good wishes to the participants.  4. Address separation emotions. |

Table S2 Demographic Characteristics of Expert Panel（n=8）

| Item | Frequency | Percentage（%） |
| --- | --- | --- |
| Age |  |  |
| 30-40 | 2 | 25.00 |
| 41-50 | 5 | 62.50 |
| ≥51 | 1 | 12.50 |
| Years of Work Experience |  |  |
| 10-20 | 3 | 37.50 |
| 21-30 | 2 | 25.00 |
| ≥31 | 3 | 37.50 |
| Education Level |  |  |
| Bachelor’s degree | 1 | 12.50 |
| Master’s degree | 3 | 37.50 |
| Doctoral degree | 4 | 50.00 |
| Professional Title |  |  |
| Intermediate | 2 | 25.00 |
| Senior | 6 | 75.00 |
| Professional Field |  |  |
| Infectious disease nursing | 2 | 25.00 |
| Psychology | 2 | 25.00 |
| Health education and counseling | 1 | 12.50 |
| Nursing education | 1 | 12.50 |
| Nursing management | 2 | 25.00 |

Table S3 Expert Authority Coefficients（n=8）

| No. | Ca | | | | Ca | Cs | Cr |
| --- | --- | --- | --- | --- | --- | --- | --- |
| Practical Experience | Theoretical Analysis | Literature Reference | Intuitive Judgment |
| 1 | 0.5 | 0.3 | 0.1 | 0.1 | 1.0 | 0.8 | 0.90 |
| 2 | 0.5 | 0.3 | 0.1 | 0.1 | 1.0 | 1.0 | 1.00 |
| 3 | 0.5 | 0.3 | 0.1 | 0.1 | 1.0 | 1.0 | 1.00 |
| 4 | 0.4 | 0.3 | 0.1 | 0.1 | 0.9 | 1.0 | 0.95 |
| 5 | 0.5 | 0.3 | 0.1 | 0.1 | 1.0 | 1.0 | 1.00 |
| 6 | 0.5 | 0.2 | 0.1 | 0.1 | 0.9 | 0.8 | 0.85 |
| 7 | 0.5 | 0.3 | 0.1 | 0.1 | 1.0 | 0.5 | 0.75 |
| 8 | 0.5 | 0.2 | 0.1 | 0.1 | 0.9 | 0.8 | 0.85 |

Note: Ca indicates judgment coefficient; Cs indicates familiarity coefficient; Cr indicates authority coefficient.

Table S4 Overall Evaluation of Intervention Program (1st Round)

| Item | Mean | SD | CV |
| --- | --- | --- | --- |
| Scientific Validity | 2.75 | 0.46 | 0.17 |
| Operability | 2.75 | 0.46 | 0.17 |
| Clarity of Objectives | 2.88 | 0.35 | 0.12 |
| Reasonableness of Method | 2.75 | 0.46 | 0.17 |
| Reasonableness of Dosage | 2.75 | 0.46 | 0.17 |
| Structural Reasonableness | 2.75 | 0.46 | 0.17 |

Note: CV indicates Coefficient of Variation

Table S5 Evaluation of Intervention Program Items (1st Round)

| Item | Mean | SD | CV |
| --- | --- | --- | --- |
| Stage 1 |  |  |  |
| Content 1 | 4.88 | 0.35 | 0.07 |
| Content 2e | 3.88 | 0.35 | 0.09 |
| Content 3e | 3.75 | 0.46 | 0.12 |
| Content 4 | 4.75 | 0.46 | 0.10 |
| Stage 2.1 |  |  |  |
| Content 1 | 4.88 | 0.35 | 0.07 |
| Content 2 | 4.88 | 0.35 | 0.07 |
| Content 3e | 3.38 | 0.52 | 0.15 |
| Content 4e | 3.75 | 0.89 | 0.24 |
| Stage 2.2 |  |  |  |
| Content 1 | 4.88 | 0.35 | 0.07 |
| Content 2e | 3.88 | 0.83 | 0.22 |
| Content 3 | 4.88 | 0.35 | 0.07 |
| Content 4 | 4.88 | 0.35 | 0.07 |
| Stage 3.1 |  |  |  |
| Content 1 | 4.88 | 0.35 | 0.07 |
| Content 2 | 4.88 | 0.35 | 0.07 |
| Content 3 | 4.88 | 0.35 | 0.07 |
| Content 4 | 4.63 | 0.52 | 0.11 |
| Content 5 | 4.88 | 0.35 | 0.07 |
| Stage 3.2 |  |  |  |
| Content 1 | 4.88 | 0.35 | 0.07 |
| Content 2 | 4.88 | 0.35 | 0.07 |
| Content 3 | 4.50 | 0.53 | 0.12 |
| Content 4 | 4.88 | 0.35 | 0.07 |
| Stage 4.1 |  |  |  |
| Content 1 | 4.88 | 0.35 | 0.07 |
| Content 2e | 3.75 | 0.71 | 0.19 |
| Content 3 | 4.88 | 0.35 | 0.07 |
| Content 4 | 4.88 | 0.35 | 0.07 |
| Stage 4.2 |  |  |  |
| Content 1 | 4.88 | 0.35 | 0.07 |
| Content 2e | 3.75 | 0.71 | 0.19 |
| Content 3 | 4.88 | 0.35 | 0.07 |
| Content 4 | 4.88 | 0.35 | 0.07 |
| Stage 5 |  |  |  |
| Content 1 | 4.88 | 0.35 | 0.07 |
| Content 2e | 4.25 | 0.89 | 0.21 |
| Content 3 | 4.88 | 0.35 | 0.07 |
| Content 4e | 2.63 | 0.74 | 0.28 |

Note: e indicates items with less than 4 or CV greater than 0.2

Table S6 Overall Evaluation of Intervention Program (2nd Round)

| Item | Mean | SD | CV |
| --- | --- | --- | --- |
| Scientific Validity | 3.00 | 0.00 | 0.00 |
| Operability | 2.88 | 0.35 | 0.12 |
| Clarity of Objectives | 3.00 | 0.00 | 0.00 |
| Reasonableness of Method | 2.75 | 0.46 | 0.17 |
| Reasonableness of Dosage | 2.75 | 0.46 | 0.17 |
| Structural Reasonableness | 2.88 | 0.35 | 0.12 |

Note: CV indicates Coefficient of Variation.

Table S7 Evaluation of Intervention Program Items (2nd Round)

| Item | Mean | SD | CV |
| --- | --- | --- | --- |
| Stage 1 |  |  |  |
| Content 1 | 4.88 | 0.35 | 0.07 |
| Content 2 | 4.50 | 0.53 | 0.12 |
| Content 3 | 4.38 | 0.52 | 0.12 |
| Stage 2.1 |  |  |  |
| Content 1 | 4.88 | 0.35 | 0.07 |
| Content 2 | 4.88 | 0.35 | 0.07 |
| Content 3f | 4.75 | 0.46 | 0.10 |
| Content 4f | 4.63 | 0.52 | 0.11 |
| Content 5 | 4.75 | 0.46 | 0.10 |
| Stage 2.2 |  |  |  |
| Content 1 | 4.88 | 0.35 | 0.07 |
| Content 2 | 4.63 | 0.52 | 0.11 |
| Content 3f | 4.88 | 0.35 | 0.07 |
| Content 4f | 4.88 | 0.35 | 0.07 |
| Content 5 | 4.88 | 0.35 | 0.07 |
| Stage 3.1 |  |  |  |
| Content 1 | 4.88 | 0.35 | 0.07 |
| Content 2 | 4.88 | 0.35 | 0.07 |
| Content 3 | 4.88 | 0.35 | 0.07 |
| Content 4 | 4.63 | 0.52 | 0.11 |
| Content 5 | 4.88 | 0.35 | 0.07 |
| Stage 3.2 |  |  |  |
| Content 1 | 4.88 | 0.35 | 0.07 |
| Content 2 | 4.88 | 0.35 | 0.07 |
| Content 3 | 4.63 | 0.52 | 0.11 |
| Content 4 | 4.88 | 0.35 | 0.07 |
| Stage 4.1 |  |  |  |
| Content 1 | 4.88 | 0.35 | 0.07 |
| Content 2f | 4.50 | 0.53 | 0.12 |
| Content 3 | 4.88 | 0.35 | 0.07 |
| Content 4 | 4.88 | 0.35 | 0.07 |
| Stage 4.2 |  |  |  |
| Content 1 | 4.88 | 0.35 | 0.07 |
| Content 2 | 4.50 | 0.53 | 0.12 |
| Content 3f | 4.50 | 0.53 | 0.12 |
| Content 4 | 4.75 | 0.46 | 0.10 |
| Stage 5 |  |  |  |
| Content 1 | 4.88 | 0.35 | 0.07 |
| Content 2 | 4.75 | 0.46 | 0.10 |
| Content 3 | 4.88 | 0.35 | 0.07 |

Note: CV indicates Coefficient of Variation; f indicates items newly added in a second round.

Table S8 Basic Characteristics of Participants (n = 7)

| No. | Age | Occupation | Diagnosis (months) | Household Registration | Education Level | Sexual Orientation | Disclosed Status | Sexual Role | Sessions Completed |
| --- | --- | --- | --- | --- | --- | --- | --- | --- | --- |
| 1 | 30 | Employed | 11 | Rural | High School | Bisexual | No | 0.5 | 8 |
| 2 | 21 | Employed | 3 | Urban | Bachelor’s | Bisexual | No | 1 | 8 |
| 3 | 23 | Student | 5 | Urban | Master’s | Homosexual | No | 1 | 8 |
| 4 | 21 | Employed | 8 | Rural | Bachelor’s | Bisexual | No | 0.5 | 7 |
| 5 | 20 | Employed | 8 | Rural | Junior college | Undecided | No | 0.5 | 7 |
| 6 | 28 | Employed | 4 | Rural | Bachelor’s | Homosexual | No | 0 | 8 |
| 7 | 29 | Employed | 3 | Urban | Bachelor’s | Homosexual | Yes | 0 | 8 |

Appendix 1: Search Strategy

1. Inclusion and Exclusion Criteria

Following the PICOS principle, inclusion criteria include: (1) Population (P): Adults aged ≥18 years; (2) Intervention (I): The intervention group uses psychological interventions such as health education, skill training, etc.; (3) Control (C): Includes, but is not limited to, conventional care and treatment methods; (4) Outcomes (O): Sense of coherence, stress, anxiety, depression; (5) Study Design (S): Randomized controlled trials. Exclusion criteria are: (1) Unclear intervention objectives, unclear intervention measures description, and lack of detailed intervention description; (2) Non-Chinese or English literature or duplicate publications; (3) Literature with unavailable or incomplete data

2. Search Strategy

Databases include China Biomedical Literature Database, China National Knowledge Infrastructure, Wanfang Database, VIP Database, PubMed, Web of Science, EBSCO, Embase, CINAHL, Clinical Trials, and the Chinese Clinical Trial Registry.

Chinese search terms include: “心理一致感/心理凝聚感/心理凝聚力/有益健康模型” and “干预/效果/实验”. English search terms were “sense of coherence/salutogenic/salutogenic model”, “intervention*/effectiveness/experimental/randomized controlled trial*/clinical trial*/quasi experiment/placebo”. For example, the search strategy in CNKI is: Title = (心理一致感 + 心理凝聚感 + 心理凝聚力 + 有益健康模型) AND (干预 + 效果 + 实验). In PubMed, the search formula is: (sense of coherence [Title/Abstract] OR salutogenic model [Title/Abstract]) AND (randomized controlled trial [Publication Type] OR randomized [Title/Abstract] OR clinical trial [Title/Abstract] OR quasi experiment [Title/Abstract] OR placebo [Title/Abstract]). In addition to electronic database searches, manual searches of references of included articles are performed to ensure completeness and systematicity of the literature.

3. Screening

Literature screening is independently carried out by two graduate students trained in evidence-based nursing. Initially, duplicate articles are removed using EndNote software, followed by a screening of titles and abstracts. Articles meeting the inclusion and exclusion criteria are further read in full to determine their inclusion. Key information is extracted from each eligible article, including author, sample size, study subjects, study design, interventions of experimental and control groups, data collection times, and outcome indicators. Any disagreements during the screening or data extraction phases are resolved through discussion, and if necessary, a third researcher's opinion is sought to ensure accuracy and fairness of the research.

Appendix 2: Construction of Intervention Content

The comprehensibility, manageability, and meaningfulness of sense of coherence encompass three aspects of an individual's response to stress situations: cognition, behavior, and motivation. These aspects jointly determine the level of sense of coherence. Based on the intervention strategy framework established by this study and combined with literature research, the intervention content is constructed, mainly including the following aspects:

（1）Construction of Intervention Content Based on Comprehensibility Strategies

Comprehensibility is the cognitive dimension of sense of coherence, including the level of cognition and understanding of stress situations. Research shows that mastering appropriate coping skills is crucial for mitigating the negative effects of stress and enhancing understanding of stress situations.( Chen Yiwen et al., 2023; Ding Qingbin et al., 2021). Therefore, interventions targeting comprehensibility should focus on the themes of “analyzing stress” and “coping with stress”.

In the theme of “analyzing stress” research indicates that men who have sex with men diagnosed with HIV usually face more stressors, such as those related to sexual orientation and infection(Chard et al., 2018; Sun et al., 2020). For this group, correctly understanding stress and accepting oneself are more important than resolving social prejudices. Therefore, in the theme of understanding stress, the main goal of the intervention is to recognize stress and accept oneself.

In the "coping with stress" theme, Williams Life Skill Training (WLST) is introduced. WLST is a set of self-practice skills for alleviating stress and reducing distress developed by Professor Williams’ team at Duke UniversityZhang Luyang & Song Xiaoyan, 2020). WLST consists of five parts and ten core skills, among which diversion skills are one of the most crucial core skills, such as “one-minute relaxation training”, “guided breathing training”, and “three-minute breathing meditation”. These are particularly useful for participants as they are not restricted by time or location and have a low learning threshold. These skills have been proven to effectively help participants cope with stress and reduce negative emotions Liu Aobo et al., 2019; Zhang Luyang & Song Xiaoyan, 2020) . Thus, incorporating these techniques in the stress coping theme can help participants better manage stress.

（2）Construction of Intervention Content Based on Manageability Strategies

Manageability is the behavioral dimension of sense of coherence, reflecting an individual’s ability to identify and utilize resources when facing stressful situations(González-Siles et al., 2022) Therefore, the intervention content targeting manageability includes two themes: “Stimulating Internal Resources” and “Identifying External Resources.”

In the “Stimulating Internal Resources” theme, cognitive psychology suggests that individuals can uncover and stimulate potential through information processing and cognitive structuring ( Bo Zhenming, 2022). Additionally, adult education theory further indicates that the success of adult learning relies on their life experiences, the relevance of the learning content, and intrinsic motivation ( Cai Yajuan, 2014). This stage involves discovering and utilizing individual internal resources by activating, cultivating, and consolidating resources. The activation process involves recalling successful events in life to activate strengths and potential capabilities ( Zhang Dan, 2021). The cultivation process encourages participants to enhance their skills and knowledge through continuous learning. Finally, the consolidation process deepens participants’ understanding of newly learned knowledge through the “Thinking and Practice” module.

In the “Identifying External Resources” theme, the intervention aims to help participants recognize available external supports and services related to HIV infection, including identifying resources from government agencies, medical resources, and community resources. Finally, through the “Thinking and Practice” module, participants will learn how to find and use these resources in real life.

（3）Construction of Intervention Content Based on Meaningfulness Strategies

Meaningfulness is the motivational dimension of sense of coherence, where individuals perceive stressful situations in life as worthy of engagement and effort. This stage is divided into two themes: "Reflecting on Meaningfulness" and "Exploring Meaningfulness," implemented through engaging and emotionally resonant methods such as watching videos and discussing real-life cases.

In the "Reflecting on Meaningfulness" theme, participants are guided through reflection by the film Ikiru. Akira Kurosawa, heralded as the Shakespeare of the cinematic era (Launer, 2020), created Ikiru, one of his masterpieces, which has received widespread acclaim (Wolfgang, 2016). The film tells the story of the protagonist seeking internal and external support and philosophical solace in the face of a disease threat, profoundly exploring the meaning of life (Wolfgang, 2016) Studies by Yang et al. show that watching Ikiru can inspire college students to contemplate and emotionally resonate with the meaning of life (Yang et al., 2022). Therefore, in the theme of reflecting on meaning, watching the movie Ikiru can provide participants with positive role models, fostering their exploration of life's meaning.

In the “Exploring Meaningfulness” theme, participants are guided through mutual aid. Psychologist Kelly McGonigal notes that helping others not only benefits the recipients but also positively impacts the helpers themselves, such as enhancing self-identity and social identity, and imbuing life with deeper meaning ( Kelly McGonigal, 2021) . This part discusses real cases of HIV-infected individuals, showing how they achieve personal growth and find spiritual fulfillment by helping others. Moreover, through the “Thinking and Practice” module, participants are encouraged to transform their viewing experiences and the insights gained from others’ stories into concrete actions.

Appendix 3: Evaluation of the Intervention Plan (Table S6)

In the first stage, the importance scores for Intervention Content 2 "Introduction of Intervention Purpose" and Intervention Content 3 "Introduction of Intervention Format" were both below 4. Experts believe that a general overview of the intervention has already been provided during the recruitment process of the participants. However, considering the time gap between recruitment and the implementation of the intervention, to prevent forgetting the information, it is advisable to retain these items but reduce the detailed description of the intervention. Furthermore, experts suggest adding content related to intervention motivation in the first stage to enhance participants' engagement. After considering the experts' opinions and the discussion results of the research team, it was decided to reduce the detailed description of the intervention to avoid redundancy, add content aimed at stimulating participants' motivation for intervention, and make corresponding revisions to the intervention content of the first stage.

In stage 2.1, Intervention Content 3 "Stress and Health" received an importance score of 3.38. Expert discussions noted that the content was too theoretical and might be difficult for participants to understand and accept, recommending its removal. It was suggested that a more straightforward and comprehensible approach be used to guide participants on how to identify and accept stress. Additionally, Intervention Content 4 "Homework Assignment" received an importance score of 3.75, with a coefficient of variation greater than 0.2. Experts expressed concerns that encouraging participants to reflect on their own stress situations might trigger unpleasant memories and increase their stress levels. It was recommended to guide participants in correctly understanding and accepting stress. After considering the expert opinions and the research team's discussions, it was decided to delete Contents 3 and 4, and add a new objective "Accept oneself."

In stage 2.2, Intervention Content 2 "Change negative perceptions of stress" scored an importance rating of 3.88 and had a coefficient of variation greater than 0.2. Experts noted that this goal and content were already indirectly covered in stage 2.1 and did not need to be reiterated at this stage. To better integrate the intervention content and ensure a more logical and clear structure, the research team decided to incorporate this part into stage 2.1. Furthermore, experts suggested adding a variety of relaxation techniques to allow participants to choose the relaxation technique that best suits their preferences to enhance the intervention's effectiveness. After considering expert opinions, the research team decided to introduce different relaxation techniques to ensure that participants could choose based on personal preferences.

In stage 3.1, under Intervention Content 2 “Understanding Internal Resources” experts suggested adding an introduction about the role of internal resources to help participants more clearly understand their importance and stimulate their willingness to use internal resources. Additionally, prompting participants to recall and reflect is crucial in the process of stimulating internal resources. Considering the importance of relaxation techniques discussed in earlier stages, the experts recommended adopting a relaxation technique in the current stage to help participants relax physically and mentally, thus better facilitating the state of recalling and reflecting. After discussion, the research team agreed that this suggestion would not only help participants consolidate and apply the knowledge learned but also enhance the intervention's effectiveness. For Content 3 “Activating Internal Resources” experts noted that most participants are young people who may find it challenging to achieve the intervention's goals in the context of being newly diagnosed with HIV and facing minority stress. Following discussion, the research team decided to accept the experts' advice and adjust the intervention strategy by guiding participants to recall more accessible experiences in life, such as their proudest skills, overcome difficulties, and satisfying decisions made, as new entry points for recollection and reflection.

In stage 3.2, for Intervention Content 2 "Understanding External Resources," experts recommended adding an introduction to the role of external resources to help participants understand their value. Additionally, regarding Intervention Content 3 “What External Resources Do I Have” specifically the third item “Social Networks and Media Resources” experts pointed out that despite the rapid development of online and social media, the quality of these resources varies significantly. Due to the lack of effective vetting mechanisms, which leads to a mixture of information, they suggested removing this item. After discussion, the research team decided to adopt the experts' recommendation, adding a new item “What External Resources Do I Have” in stage 3.2 intervention content, while removing the item “Social Networks and Media Resources”.

In stage 4.1, Intervention Content 2 “How would you choose and pursue the meaning of life when facing adversity” received an importance score of 3.75. Experts noted that this question is profound and requires more time for meaningful contemplation. Due to time constraints within the intervention process, it may not be possible to provide participants with sufficient time to fully consider this issue, potentially hindering the achievement of the desired depth of thought. After discussion, the research team decided to delete Intervention Content 2. Additionally, experts suggested that Ikiru is a deeply meaningful film that has had a positive impact in university campuses and research settings. They recommended providing a brief introduction to the film before showing it to stimulate participants' engagement. The research team found this to be a valuable suggestion and decided to adopt the expert's advice, adding new intervention content “Plot of Ikiru”. Finally, experts considered the integration of the film into the intervention to be a novel idea but noted the film's length might make it challenging to ensure participants watch it in its entirety. After discussion, the research team acknowledged this important reminder and took several measures to ensure the completeness and effectiveness of the intervention. First, the team members watched the film repeatedly and conducted extensive research and discussion, ultimately deciding to use a film commentary and show important excerpts from the film as part of the intervention. The main content of the film was divided into five stages: The Realm of Comfort, Challenges of Fate, Despair in the Dark, The Dawn of Hope, The Meaning of Life. This approach ensured the effective presentation of intervention content while also controlling the intervention duration.

In stage 4.2, Intervention Content 2 “Stimulating Participants Thought and Emotional Experience” received an importance score of 3.63. Experts believed this part of the intervention was too theoretical, which might make it difficult for participants to understand, and recommended deleting this item and adopting more vivid methods, such as stories, videos, or games. After in-depth discussion, the research team decided to accept the expert's suggestion, cancel the planned content item 2 for this stage, and add detailed elaboration of the research theme through real cases of HIV-infected individuals.

In the fifth phase, Intervention Content 2 “Encourage participants to apply the learned content in their daily lives, emphasizing the importance of applying knowledge to practice” had a coefficient of variation of 0.21, indicating a lack of consensus among experts, but it received an importance score of 4.25. After discussion, the research team considered this item beneficial, encouraging participants to put into practice what they have learned, rather than merely understanding it at a theoretical level. This is not only a review and application of the intervention content but also one of the goals of the intervention itself. Therefore, it was ultimately decided to retain this item. Intervention Content 4 “Address separation emotions” received an importance score of 2.63 and a coefficient of variation of 0.28. Experts believed that although the intervention lasted for two months, with only one session per week, it would not cause separation anxiety among participants. Thus, after discussion, the research team decided to adopt the expert's advice and delete this item.

Appendix 4: Feedback on the Intervention Program

1. Concerns about Privacy Breaches

During the pilot study, participants expressed their need for privacy protection. One said, “I am very concerned about my privacy being breached, and I hope you can ensure the security of my information." They also highlighted the importance of protecting personal sensitive information, "I don't want others to know about my sexual orientation and HIV status."

To ensure the participants' privacy is fully protected, this study implemented strict privacy measures. Firstly, before data collection, intervention personnel signed a patient confidentiality agreement. During data collection, no personally identifiable information of participants was collected. Secondly, all collected data were encrypted and securely stored to ensure their privacy and security during storage.

2. Low Engagement in the “Thinking and Practice” Module

In the initial stages of this study, participants were hesitant about the “Thinking and Practice” module, expressing confusion and self-doubt: “At the beginning, I didn’t know how to do the reflection and practice parts, nor did I know where to start." The other said, "I don’t know how to describe my internal resources; I feel like I am worthless." These responses indicate low engagement in the "Reflection and Practice" module.

To increase participant engagement in “Thinking and Practice” the research team made the following adjustments. First, ensure that each “Thinking and Practice” session has a clear goal, and communicate it to participants in a straightforward and understandable manner to help them understand each exercise and clarify its objectives. Second, enhance the appeal of this module through diverse methods. This includes introducing talks by Stanford psychologist Kelly McGonigal on stress to enrich the content and form, thereby increasing participant interest. Finally, adopt positive reinforcement strategies, such as providing small gifts, to encourage active participation.

3. Poor Layout of Some Graphic and Text Materials

Participants provided specific feedback on the provided graphic and text materials, highlighting some issues: "Some of the text is too small, and I find it very tiring to read. It would be better if it could be simplified." This directly reflects problems with the readability of the materials and indicates poor layout of the graphic and text materials, affecting the effective transmission of information and the learning experience of participants.

To address these issues, the research team optimized and adjusted the graphic and text materials. First, the layout of the graphic and text materials was redesigned, with special attention to adjusting the font size to ensure it is moderate and easy to read, reducing visual fatigue for participants during reading. Second, to further reduce the reading burden and increase the attractiveness of the materials, some text content was converted into audio format. This change not only lightens the reading load for participants but also provides a more flexible and convenient learning method. Lastly, the inclusion of more images makes the materials not only easier to understand but also more engaging.

4. Busy and Neglectful Participation

Participants noted during the process, "I find this very helpful, but I'm busy with work and easily forget to check in." In response to participants forgetting to engage in the intervention due to busy schedules, the research team implemented the following measures. First, they enriched the content formats of the intervention plan, including adding audio, pictures, and real-life cases, to enhance the appeal and interest of the intervention. Additionally, they established weekly reminders to prevent participants from forgetting to engage in the intervention due to busy work or study schedules.

5. Quiet Video Volume

Participants complained about the low volume of the video content: "The volume of the video is too low" and "I have to wear headphones and turn up the volume to hear clearly when watching the video. I hope you can adjust this; I don't want people nearby to know what I'm listening to." To address this issue, the research team took the following steps. First, they re-recorded the video content to ensure that the speaker's voice was loud and clear. Furthermore, to improve the sound quality, professional equipment was used for recording, allowing participants to hear the audio content more clearly when watching the videos

6. Affirmation of the Intervention Plan

Participants expressed appreciation and affirmation for the intervention plan. “Thank you for focusing on our group; the content is very practical, and I hope I can overcome the darkness soon” and “After being diagnosed, I looked down on myself and felt everything was over. Through this project, I've learned how to gradually accept myself and recognize that I still have value”.

Chard, A. N., Metheny, N. S., & Sullivan, P. S. (2018). Social Stressors and Intoxicated Sex Among an Online Sample of Men who have Sex with Men (MSM) Drawn from Seven Countries. *Subst Use Misuse*, *53*(1), 42-50.

González-Siles, P., Martí-Vilar, M., González-Sala, F., Merino-Soto, C., & Toledano-Toledano, F. (2022). Sense of Coherence and Work Stress or Well-Being in Care Professionals: A Systematic Review. *Healthcare (Basel)*, *10*(7).

Launer, J. (2020). Red Beard: Kurosawa's medical masterpiece. *Postgrad Med J*, *96*(1140), 641-644.

Sun, S., Pachankis, J. E., & Li, X. (2020). Addressing Minority Stress and Mental Health among Men Who Have Sex with Men (MSM) in China. *Curr HIV/AIDS Rep*, *17*(1), 35-62.

Wolfgang, W. (2016). Cancer and the arts: the fight for meaning - Akira Kurosawa's "Ikiru". *ESMO Open*, *1*(6), e000131.

Yang, W., Hu, W., Morita, N., Ogai, Y., Saito, T., & Wei, Y. (2022). Impact of Short-Term Intensive-Type Cognitive Behavioral Therapy Intervention on Internet Addiction among Chinese College Students: A Randomized Controlled Trial. *Int J Environ Res Public Health*, *19*(9).

Zhang, S., Wang, H., Chen, C., Zhou, J., & Wang, X. (2015). Effcacy of Williams LifeSkills Training in improving psychological health of Chinese male juvenile violent offenders: a randomized controlled study. *Neurosci Bull*, *31*(1), 53-60.

Bo, Zhenming. (2022). Research on Virtual Reality Interactive Interface Design Based on Cognitive Psychology [Master's Thesis, Jinan, Shandong University].

Cai, Yajuan. (2014). Application of Adult Education Theory in Health Education for Peritoneal Dialysis Patients. Chinese Journal of Nursing Education, 11(08), 622-625.

**Chen, Yiwen**, **He, Huijuan**, & **Zhang, Yuan**. (2023). The Chain Mediating Role of Stress Perception and Active Coping between Nursing Students' Sense of Life Meaning and Professional Identity. In **Chen, Yiwen**, **He, Huijuan**, & **Zhang, Yuan** (Eds.), Journal of Nursing Science (Vol. 38, pp. 85-89).

**Ding, Qingbin**, **Li, Yanshuang**, **Tang, Renhong**, **Wang, Xiaoyuan**, & **Chen, Meihong**. (2021). The Effect of Stress Perception on Anxiety in Young and Middle-Aged Type 2 Diabetes Patients: The Mediating Role of Coping Strategies. In **Ding, Qingbin**, **Li, Yanshuang**, **Tang, Renhong**, **Wang, Xiaoyuan**, & **Chen, Meihong** (Eds.), Chinese Journal of Health Psychology (Vol. 29, pp. 204-209).

**Kelly McGonigal**. (2021). The Willpower Instinct: How Self-Control Works, Why It Matters, and What You Can Do to Get More of It. Beijing: Beijing United Publishing Co., Ltd.

**Liu, Aobo**, **Sun, Jing**, **Lian, Dongmei**, **Xiang, Na**, **Chen, Yanjun**, **Wang, Yangyang**, & **Li, Yang** (Eds.). (2019). Observation on the Effect of Williams Life Skills Training in Alleviating Parenting Stress in Parents of Children with Systemic Lupus Erythematosus. Nursing Research, 33, 3338-3344.

**Zhang, Dan**. (2021). A Study on Suicidal Ideation and Intervention in Elderly People in Nursing Homes, Focused on Psychological Resilience [Doctoral Dissertation, Jinan, Shandong University].

**Zhang, Luyang**, & **Song, Xiaoyan**. (2020). The Effect of Williams Life Skills Training Combined with Psychological Projection on Mood State and Health Behavior in Primary Hypertension Patients. Journal of Clinical Psychosomatic Diseases, 26(06), 72-77.
